# Supplementary material for: High-throughput interrogation of programmed ribosomal frameshifting in human cells
Source: PubMed Central journal article supplement (PMC7297798; doi:10.1038/s41467-020-16961-8), 2020-06-16
Supplement: 41467_2020_16961_MOESM4_ESM.pdf [file 41467_2020_16961_MOESM4_ESM.pdf]

## **Description of Additional Supplementary Files**

File Name: Supplementary Data 1

Description: Previously reported PRF events tested here.

File Name: Supplementary Data 2

Description: Sequence, design information and experimental readouts for all library variants tested.

File Name: Supplementary Data 3

Description: Predicted secondary structure (pKiss) for library variants with systematic sequence alterations in the region downstream of the slippery site.
